# Supplementary material for: KRAB zinc-finger proteins regulate endogenous retroviruses to sculpt germline transcriptomes and genome evolution
Source: HighWire-hosted journal article supplement (doi:10.1101/gr.279924.124), 2025-03-01
Supplement: Supplemental_Table3.xlsx [file Supplemental_Table3.xlsx]

## Sheet: Sheet1
Supplemental_Table 3: List of primer sequences used in this study
	SS	AS
Hprt	AGCCCCAAAATGGTTAAGGTTG	TTGCAGATTCAACTTGCGCTCA
Zfp987	CTGTAACAGTGAATACTTACAGGCTAT	AGTGTGGAGCCTCAAGTGTT
ERVB4_1C-LTR	CACCCAGGGCTGTTAAGGAG	AAAGAAGTGGGCATCTGGGG
Or1f19	GTTGTTGGGTCCTGGATGGT	AGTAGAGTTGAGCCACGAGC
Vmn2r100	CATAGACCTGCCTGTTTCCG	TCATCTTCGACTCCTCCCACT
Zfp989	TGCCAGATCAGAGGTCTCCA	CCCAGGGTCCAGTGAAGAAC
IAPLTR1a	ACTCCATGTGCTCTGCCTTC	AGGACGTGTCACTCCCTGAT
Ube3a	CCACCTAGTCCTCTCGTCCA	GGAGTCACCCAAAGAGGAGC
