# Supplementary material for: KRAB zinc-finger proteins regulate endogenous retroviruses to sculpt germline transcriptomes and genome evolution
Source: HighWire-hosted journal article supplement (doi:10.1101/gr.279924.124), 2025-03-01
Supplement: Supplemental_Table4.xlsx [file Supplemental_Table4.xlsx]

## Sheet: RNA-seq
Supplemental_Table 4: RNA-seq, ChIP-seq and ChIP-exo data used in this study
Species	Material	GEO accession	SRA study accession	Layout	Reads
				(Single(SE)/Paired(PE))
mouse	Brain	GSE93496	SRP013027	PE	25M
mouse	Heart	GSE93483	SRP013027	PE	25M
mouse	Kidney	GSE93492	SRP013027	PE	27M
mouse	Liver	GSE93485	SRP013027	PE	26M
mouse	Lung	GSE93502	SRP013027	PE	24M
mouse	Ovary	GSE93494	SRP013027	PE	32M
mouse	Placenta	GSE90203	SRP013027	PE	24M
mouse	Spleen	GSE93503	SRP013027	PE	24M
mouse	Testis	GSE93488	SRP013027	PE	52M
mouse	Sertoli	GSE154484	SRP272065	PE	15M
mouse	E18.5PSG	-	ERP015330	PE	19M
mouse	THY1+	GSE55060	SRP037992	SE	20M
mouse	KIT+	GSE89502	SRP092547	SE	21M
mouse	PS	GSE55060	SRP037992	SE	16M
mouse	RS	GSE55060	SRP037992	SE	13M
mouse	Sperm	-	DRP000508	SE	37M
human	SG	-	SRP075318	PE	36M
human	PriSC	-	SRP075318	PE	32M
human	RS	-	SRP075318	PE	35M

## Sheet: ChIP-seq_ChIP-exo
Species	Material	ChIP-target	GEO accession	SRA study	Layout	Reads
				accession
mouse	B6 ESC,	murine	GSE115291	SRP149699	SE	Various
	F9 EC cells	KZFPs
mouse	KIT+	H3K9me3	GSE137744	SRP222567	PE	14M
mouse	PS	H3K9me3	GSE137744	SRP222567	PE	27M
mouse	KIT+	H3K27ac	GSE107398	SRP125760	SE	29M
mouse	PS	H3K27ac	GSE107398	SRP125760	SE	35M
mouse	TypeB	H3K9me3	GSE132446	SRP200968	SE	16M
	spermatogonia
mouse	Leptonema	H3K9me3	GSE132446	SRP200968	SE	23M
mouse	Mid	H3K9me3	GSE132446	SRP200968	SE	22M
	-Zygonema
mouse	Mid-	H3K9me3	GSE132446	SRP200968	SE	30M
	pachynema
mouse	Diplonema	H3K9me3	GSE132446	SRP200968	SE	36M
mouse	TypeB	H3K27ac	GSE132446	SRP200968	SE	15M
	spermatogonia
mouse	Leptonema	H3K27ac	GSE132446	SRP200968	SE	18M
mouse	Mid	H3K27ac	GSE132446	SRP200968	SE	26M
	-Zygonema
mouse	Mid	H3K27ac	GSE132446	SRP200968	SE	27M
	-pachynema
mouse	Diplonema	H3K27ac	GSE132446	SRP200968	SE	26M
human	HEK293T	human	GSE78099	SRP070561	SE	Various
		KZFPs
